# Supplementary material
Source: PubMed Central journal article supplement (PMC10164098)
Supplement: NIHMS1876115-supplement-2.pdf [file NIHMS1876115-supplement-2.pdf]

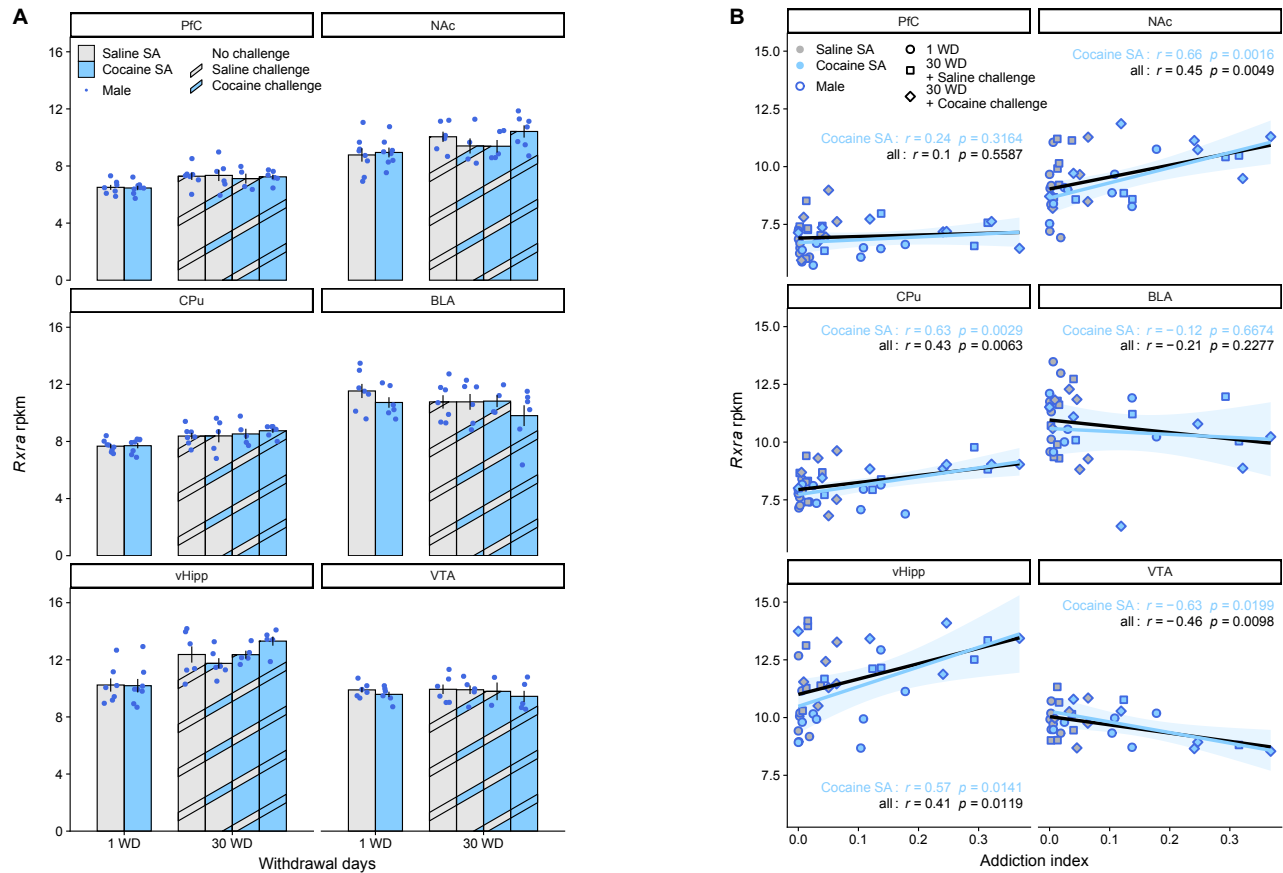

**Figure S1. Brain-wide RXR $\alpha$  expression after cocaine self-administration.** (related to Figure 1)

- (A)** RNAseq of bulk NAc tissue showed no regulation of *Rxra* transcripts across experimental groups in any of the six brain regions analyzed (data from original study<sup>11</sup>).
- (B)** Correlation between *Rxra* levels and the Addiction Index, a composite metric representative of addiction-like behavioral domains computed using exploratory factor analysis<sup>11</sup> was positive in NAc (across all samples: Pearson's  $r = 0.45$ ,  $p = 0.0049$ ; across cocaine SA samples only: Pearson's  $r = 0.66$ ,  $p = 0.0016$ ), CPu (across all samples: Pearson's  $r = 0.43$ ,  $p = 0.0063$ ; across cocaine SA samples only: Pearson's  $r = 0.63$ ,  $p = 0.0029$ ) and vHipp (across all samples: Pearson's  $r = 0.41$ ,  $p = 0.0119$ ; across cocaine SA samples only: Pearson's  $r = 0.57$ ,  $p = 0.0141$ ) and negative in VTA (across all samples: Pearson's  $r = -0.46$ ,  $p = 0.0098$ ; across cocaine SA samples only: Pearson's  $r = -0.63$ ,  $p = 0.0199$ ).

Bar graphs represent mean  $\pm$  sem. Correlation graphs represent regression line with its 95% confidence interval.

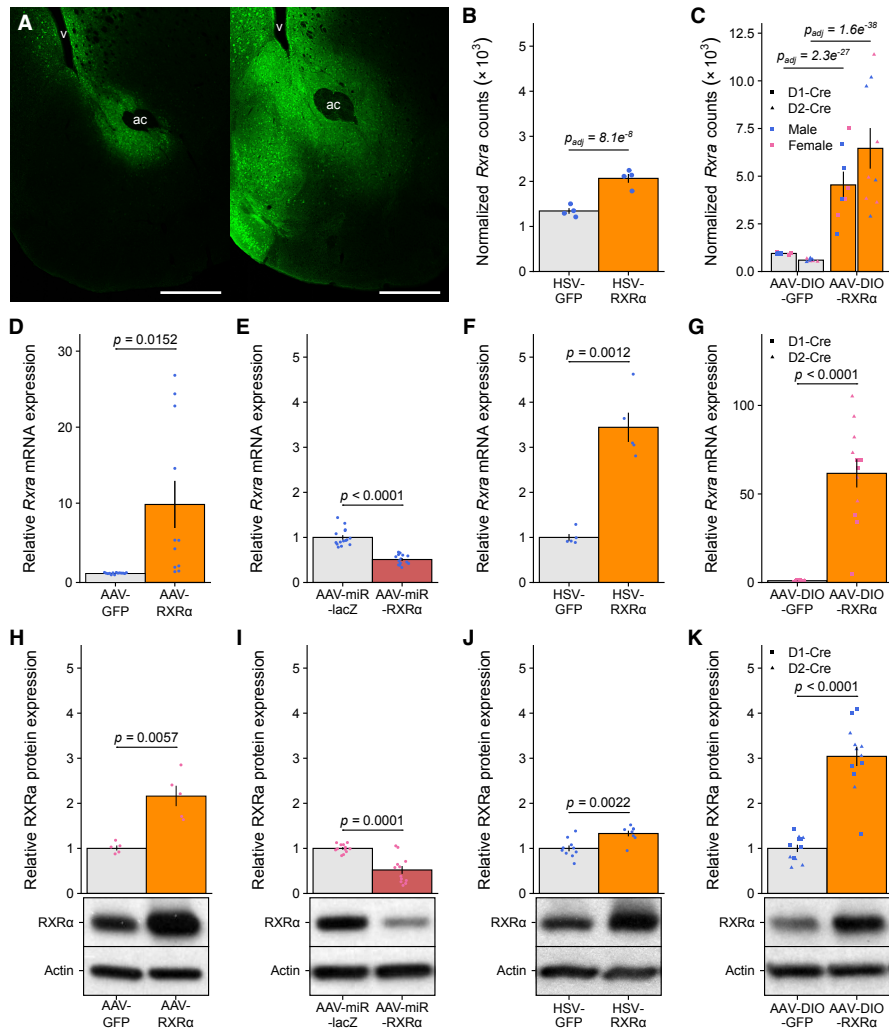

**Figure S2. Validation of viral constructs.** (related to Figures 1, 3, 4, 5 and 6)

- (A) Representative images of viral infusions targeting the anterior NAc core for HSV (left) and AAV (right) viruses, picturing maximal levels of viral spread in tissue. HSV infection was restricted to NAc core, while AAV infections spread to NAc core and medial shell. Backflow infection was observed  $\sim 20\%$  of the time along both sides of the lateral ventricles, as shown in these representative images, but the presence of such backflow did not affect results of the experiments. ac anterior commissure, v lateral ventricle. Scale bars represent 500  $\mu\text{m}$ .
- (B) NAc *Rxra* transcripts count was significantly increased in male wild type mice injected with HSV-RXR $\alpha$  via RNAseq (Figure 1 dataset; Wald's test,  $p_{adj} = 8.1e^{-8}$ ).
- (C) *Rxra* transcript counts were significantly increased in D1-MSNs from male and female D1-Cre  $\times$  *fl/fl*eGFP::L10a mice (Figure 3 dataset; Wald's test,  $p_{adj} = 2.3e^{-27}$ ) and in D2-MSNs from male and female D2-Cre  $\times$  *fl/fl*eGFP::L10a mice sorting (Figure 4 dataset; Wald's test,  $p_{adj} = 1.6e^{-38}$ ) injected with AAV-DIO-RXR $\alpha$  via RNAseq after FAN-sorting.
- (D) NAc *Rxra* transcript levels were significantly increased in male wild type mice injected with AAV-RXR $\alpha$  via RT-qPCR (unpaired Welch's *t*-test:  $t_{10.003} = -2.923$ ,  $p = 0.01522$ ).
- (E) NAc *Rxra* transcripts levels were significantly decreased in male wild type mice injected with AAV-miR-RXR $\alpha$  via RT-qPCR (unpaired Welch's *t*-test:  $t_{22.58} = 8.4543$ ,  $p = 1.899e^{-8}$ ).
- (F) NAc *Rxra* transcripts levels were significantly increased in male wild type mice injected with HSV-RXR $\alpha$  via RT-qPCR (unpaired Welch's *t*-test:  $t_{4.4178} = -7.3332$ ,  $p = 0.00124$ ).

- (G)** NAc *Rxra* transcripts levels were significantly increased in female D1-Cre and D2-Cre mice injected with AAV-DIO-RXR $\alpha$  via RT-qPCR (LMM-ANOVA: main effect of Virus:  $F_{1,20} = 77.2889$ ,  $p = 1.559e^{-8}$ , followed by Sidak's *post hoc* tests).
- (H)** NAc RXR $\alpha$  protein levels were significantly increased in female wild type mice injected with HSV-RXR $\alpha$  via Western blotting (unpaired Welch's *t*-test:  $t_{4,4893} = -4.9468$ ,  $p = 0.005747$ ).
- (I)** NAc RXR $\alpha$  protein levels were significantly increased in male wild type mice injected with HSV-RXR $\alpha$  via Western Blot (unpaired Welch's *t*-test:  $t_{15,847} = 3.6574$ ,  $p = 0.002155$ ).
- (J)** NAc RXR $\alpha$  protein levels were significantly decreased in female wild type mice injected with AAV-miR-RXR $\alpha$  via Western Blot (unpaired Welch's *t*-test:  $t_{13,186} = 5.2867$ ,  $p = 0.0001404$ ).
- (K)** NAc RXR $\alpha$  protein levels were significantly decreased in male D1-Cre and D2-Cre mice injected with AAV-DIO-RXR $\alpha$  via Western Blot (LMM-ANOVA: main effect of Virus:  $F_{1,20} = 74.8156$ ,  $p = 3.418e^{-8}$ , followed by Sidak's *post hoc* tests).

Representative Western Blot pictures for RXR $\alpha$  and control actin bands are attached to the corresponding quantification. Bar graphs represent mean  $\pm$  sem.

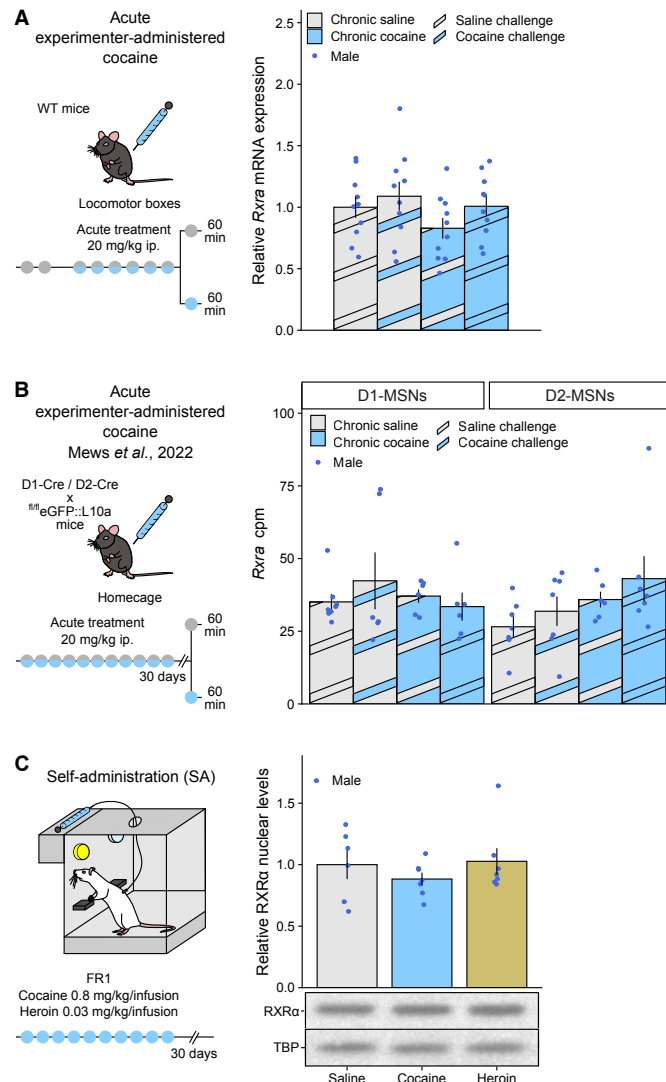

**Figure S3. RXR $\alpha$  expression after chronic drug exposure.** (related to Figures 2 and 3)

- (A)** NAc *Rxra* transcripts levels were not significantly regulated in male wild type mice after 6 days of chronic cocaine and 60 min after a cocaine challenge or not (LMM-ANOVA: main effect of Chronic:  $F_{1,36} = 1.8299$ ,  $p = 0.1846$ , main effect of Challenge:  $F_{1,36} = 2.0562$ ,  $p = 0.1602$ , interaction Chronic:Challenge:  $F_{1,36} = 0.2277$ ,  $p = 0.6361$ , followed by Sidak's *post hoc* tests).
- (B)** *Rxra* transcripts counts were not significantly regulated in either sorted D1- or D2-MSNs from male D1-Cre or D2-Cre  $\times$  <sup>fl/fl</sup>eGFP::L10a mice after 10 days of chronic cocaine and 60 min after a cocaine challenge injection 30 days later (original data from <sup>41</sup>), reanalyzed by LMM-ANOVA, full statistics in Supplemental Table S6)
- (C)** NAc RXR $\alpha$  nuclear levels were not significantly regulated after 30 days of withdrawal from cocaine or heroin self-administration in male rats (LMM-ANOVA: main effect of Drug:  $F_{2,17} = 0.6878$ ,  $p = 0.5161$ )

Representative Western Blot pictures for RXR $\alpha$  and control TBP bands are attached to the corresponding quantification. Bar graphs represent mean  $\pm$  sem.

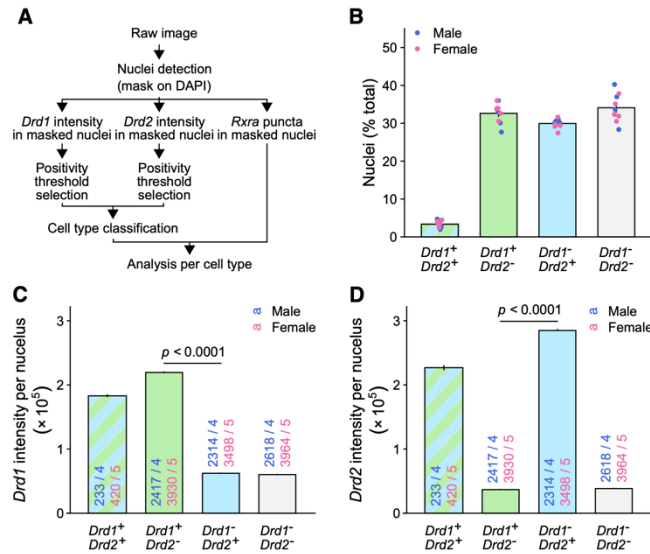

**Figure S4. RNA FISH-based classification of NAc cell types.** (related to Figure 3)

- (A) Schematic pipeline for RNA FISH image analysis, cell type classification and signal quantification.
- (B) Detected and classified cell types recapitulated expected relative abundance in mouse NAc (LMM-ANOVA: main effect of CellType:  $F_{3,28} = 291.6805$ ,  $p < 2e^{-16}$ , followed by Sidak's *post hoc* tests).
- (C) *Drd1* expression across NAc cell types (LMM-ANOVA: main effect of CellType:  $F_{3,19381.2} = 16327.88$ ,  $p < 2e^{-16}$ , followed by Sidak's *post hoc* tests).
- (D) *Drd2* expression across NAc cell types (LMM-ANOVA: main effect of CellType:  $F_{3,19380.4} = 21539.97$ ,  $p < 2e^{-16}$ , followed by Sidak's *post hoc* tests).

Bar graphs represent mean  $\pm$  sem after combining male and female data.

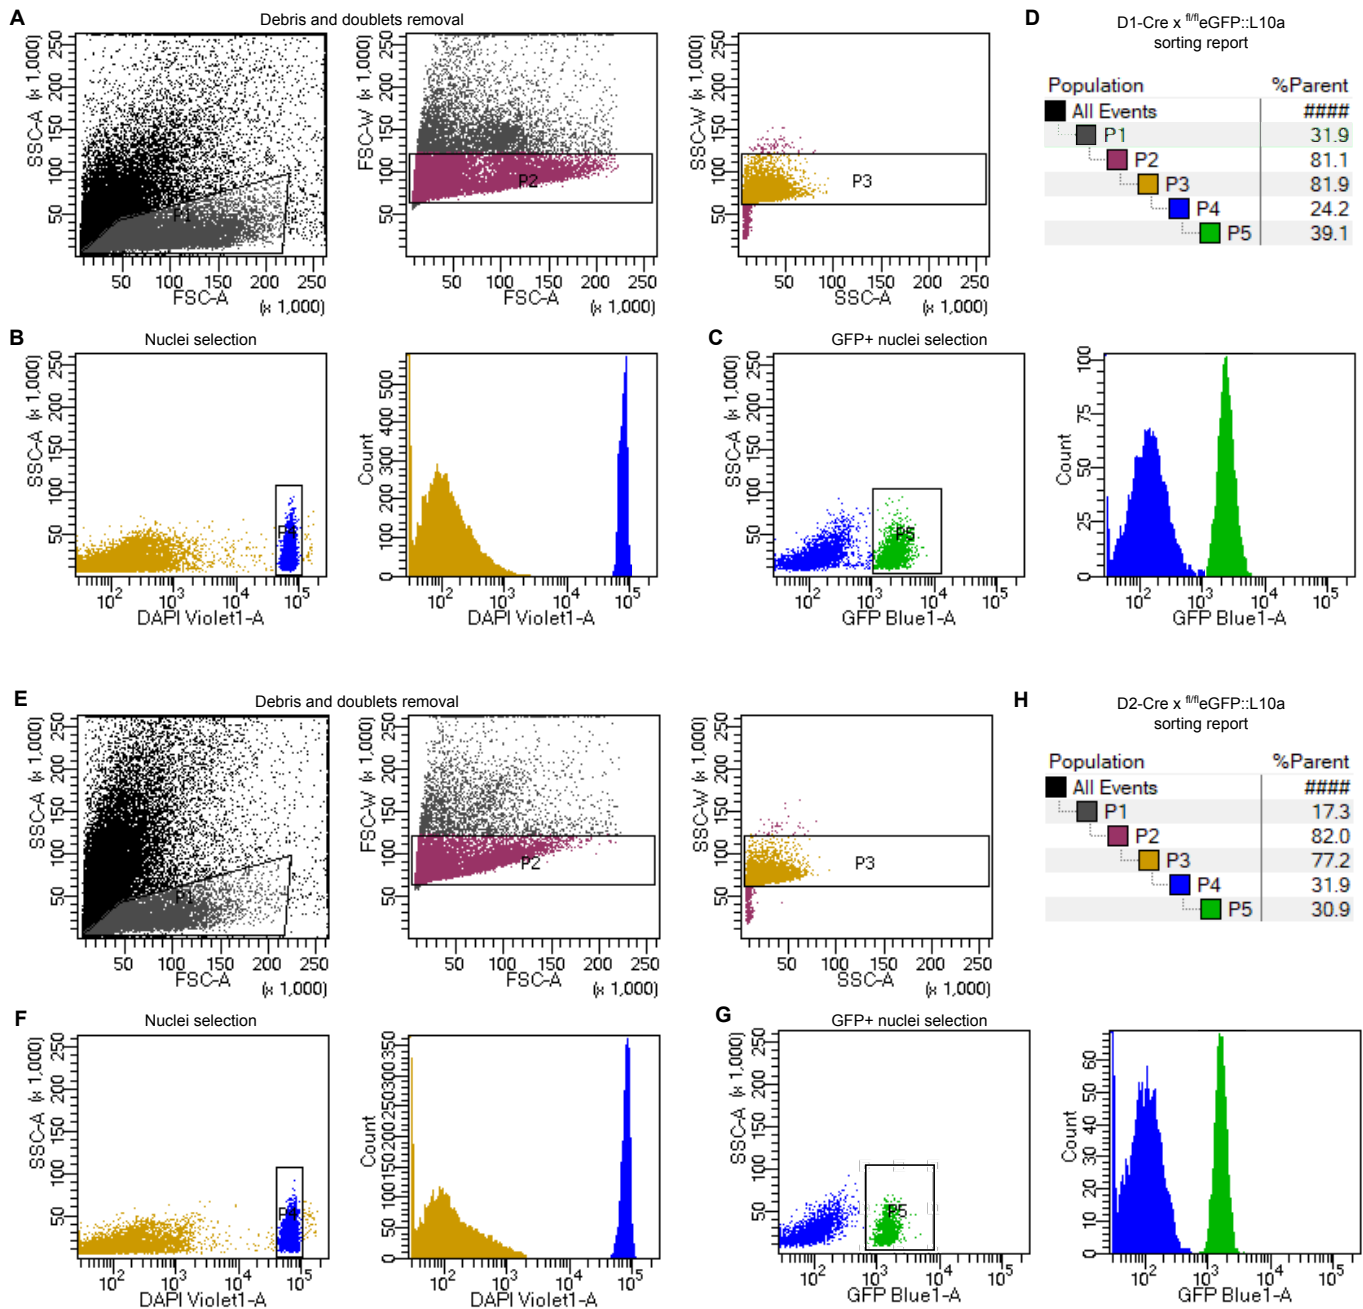

**Figure S5. FAN-sorting of nuclei from D1- and D2-MSNs.** (related to Figure 3)

- (A) Representative FANS gating strategy to exclude debris and doublets from a D1-Cre x <sup>fl/fl</sup>eGFP::L10a sample.
- (B) Representative FANS gating strategy to select nuclei (ie DAPI+ events) from a D1-Cre x <sup>fl/fl</sup>eGFP::L10a sample.
- (C) Representative FANS gating strategy to select D1-MSNs nuclei (ie GFP+ events) from a D1-Cre x <sup>fl/fl</sup>eGFP::L10a sample.
- (D) Summary of FAN-sorting hierarchical gating strategy for a D1-Cre x <sup>fl/fl</sup>eGFP::L10a sample.
- (E) Representative FANS gating strategy to exclude debris and doublets from a D2-Cre x <sup>fl/fl</sup>eGFP::L10a sample.
- (F) Representative FANS gating strategy to select nuclei (ie DAPI+ events) from a D2-Cre x <sup>fl/fl</sup>eGFP::L10a sample.
- (G) Representative FANS gating strategy to select D2-MSNs nuclei (ie GFP+ events) from a D2-Cre x <sup>fl/fl</sup>eGFP::L10a sample.
- (H) Summary of FAN-sorting hierarchical gating strategy for a D2-Cre x <sup>fl/fl</sup>eGFP::L10a sample.

FSC = Forward Scatter, SSC = Side Scatter.

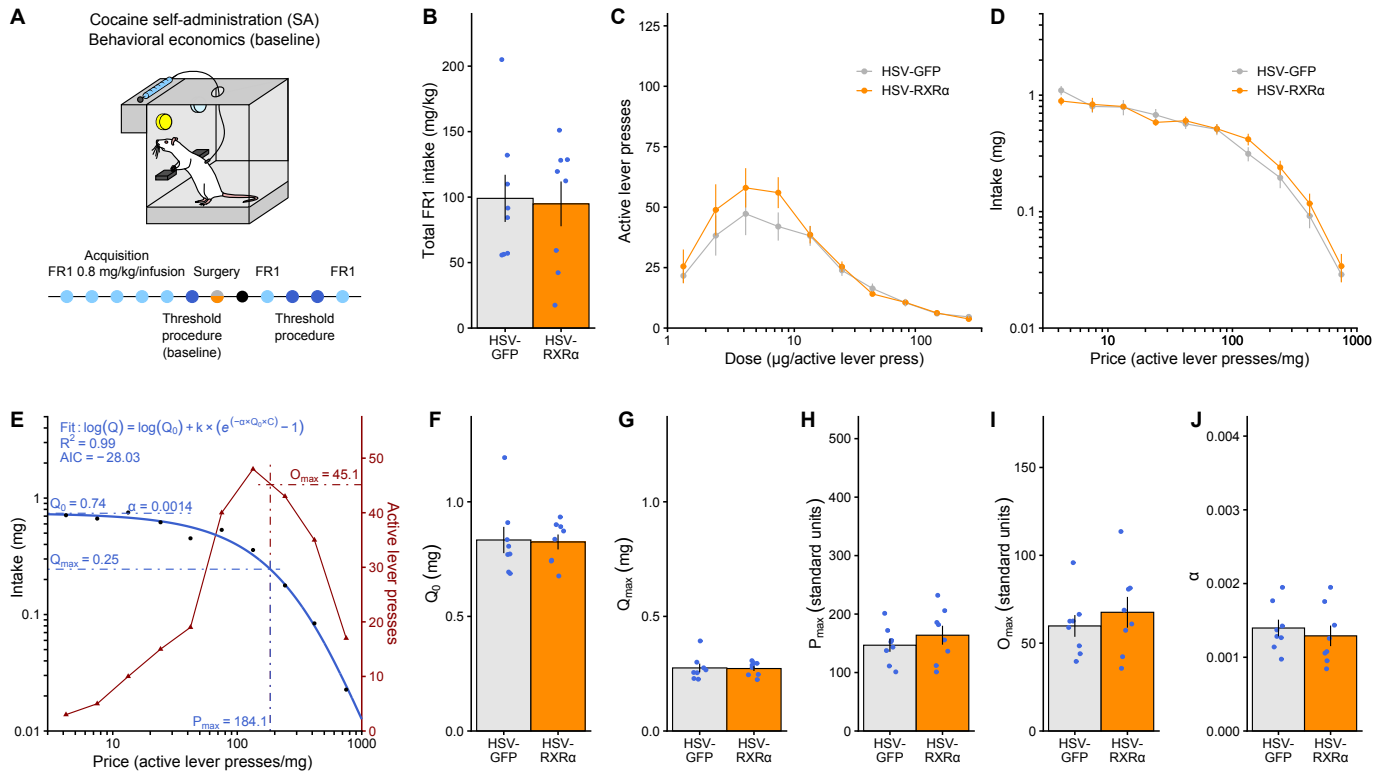

**Figure S6. Behavioral economics metrics before RXR $\alpha$  overexpression.** (related to Figure 6)

- (A) Experimental design for behavioral economics testing, using male rats ( $n = 8/\text{group}$ ). Before surgery, animals went through the threshold procedure to assess motivation at baseline, which is described here.
- (B) Total cocaine intake in acquisition FR1 sessions was similar before group assignment (unpaired Welch's  $t$ -test:  $t_{13.961} = 0.16909$ ,  $p = 0.8682$ ).
- (C) Dose response curves in the threshold procedure showed similar responding before group assignment (LMM-ANOVA: interaction Dose:Virus:  $F_{9,126} = 0.7509$ ,  $p = 0.6617$ , followed by Sidak's *post hoc* tests).
- (D) Averaged demand curves were also similar before group assignment (LMM-ANOVA: interaction Price:Virus:  $F_{9,126} = 0.9386$ ,  $p = 0.4943$ , followed by Sidak's *post hoc* tests).
- (E) Representative example of task performance in the threshold procedure at baseline (from a rat later injected with HSV-GFP control), highlighting mathematical demand curve fitting and extraction of behavioral economics parameters. Goodness of fit was assessed by computing a pseudo- $R^2$  coefficient and the Akaike Information Criterion (AIC) for each individual fit.
- (F) Consumption at low effort  $Q_0$  (unpaired Welch's  $t$ -test:  $t_{11.098} = 0.12458$ ,  $p = 0.9031$ ),
- (G) consumption at maximum effort  $Q_{\max}$  (unpaired Welch's  $t$ -test:  $t_{11.016} = 0.13065$ ,  $p = 0.8984$ ),
- (H)  $P_{\max}$  (unpaired Welch's  $t$ -test:  $t_{12.512} = -0.87304$ ,  $p = 0.3991$ ),
- (I)  $O_{\max}$  (unpaired Welch's  $t$ -test:  $t_{12.601} = -0.72455$ ,  $p = 0.482$ ) and
- (J) demand elasticity  $\alpha$  (unpaired Welch's  $t$ -test:  $t_{13.426} = 0.58991$ ,  $p = 0.5651$ ) were similar before group assignment. Bar graphs and line graphs represent mean  $\pm$  sem.

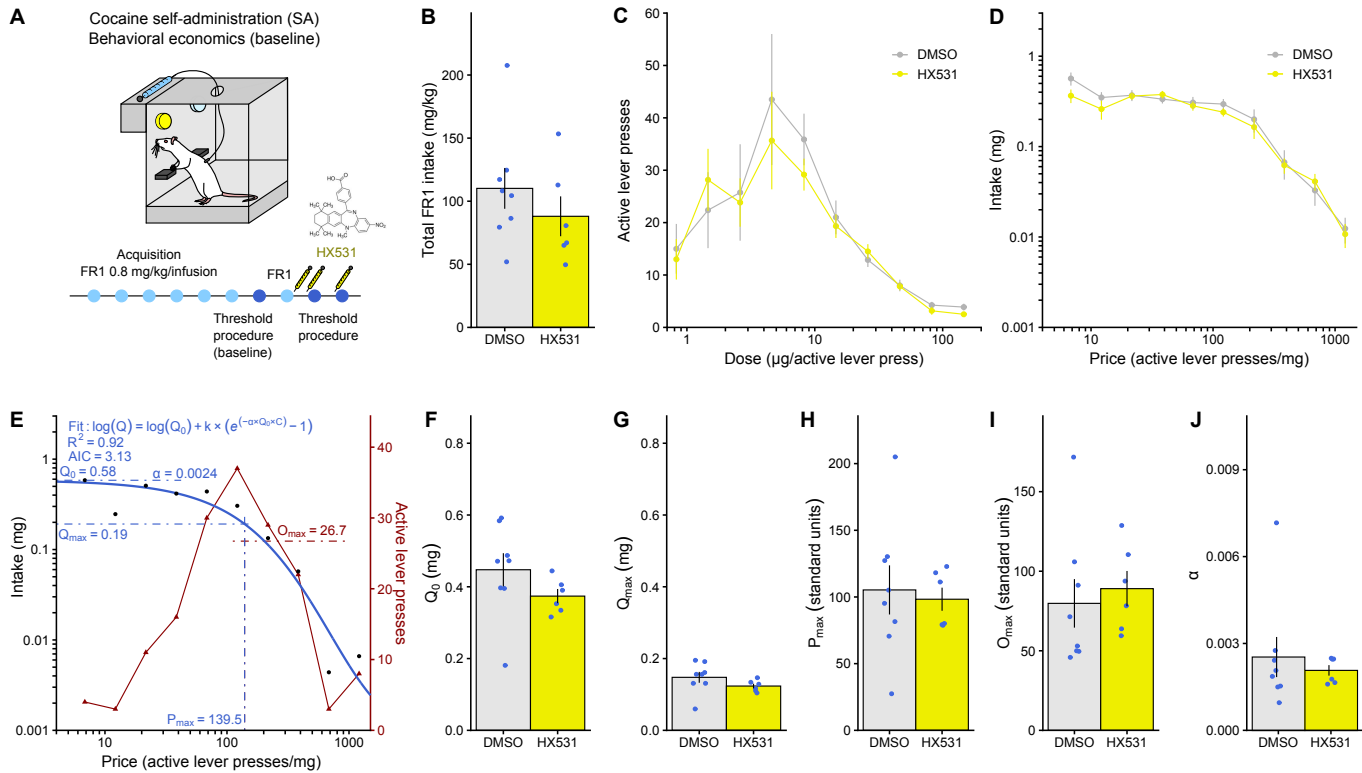

**Figure S7. Behavioral economics metrics before HX531 treatment. (related to Figure 7)**

- (A)** Experimental design for behavioral economics testing, using male rats ( $n = 6-8/\text{group}$ ). Before group allocation, animals went through the threshold procedure to assess motivation at baseline, which is described here.
- (B)** Total cocaine intake in acquisition FR1 sessions was similar before group assignment (unpaired Welch's  $t$ -test:  $t_{11.753} = 0.97974$ ,  $p = 0.347$ ).
- (C)** Dose response curves in the threshold procedure showed similar responding before group assignment (LMM-ANOVA: interaction Dose:Treatment:  $F_{9,108} = 0.3064$ ,  $p = 0.9713$ , followed by Sidak's *post hoc* tests).
- (D)** Averaged demand curves were also similar before group assignment (LMM-ANOVA: interaction Price:Treatment:  $F_{9,108} = 1.3182$ ,  $p = 0.2359$ , followed by Sidak's *post hoc* tests).
- (E)** Representative example of task performance in the threshold procedure at baseline (from a rat later treated with DMSO), highlighting mathematical demand curve fitting and extraction of behavioral economics parameters. Goodness of fit was assessed by computing a pseudo- $R^2$  coefficient and the Akaike Information Criterion (AIC) for each individual fit.
- (F)** Consumption at low effort  $Q_0$  (unpaired Welch's  $t$ -test:  $t_{9.3667} = 1.4658$ ,  $p = 0.1754$ ) was similar before group assignment.
- (G)** Consumption at maximum effort  $Q_{max}$  (unpaired Welch's  $t$ -test:  $t_{9.353} = 1.4754$ ,  $p = 0.173$ ) was also similar.
- (H)**  $P_{max}$  (unpaired Welch's  $t$ -test:  $t_{9.769} = 0.34296$ ,  $p = 0.7389$ ) was also similar.
- (I)**  $O_{max}$  (unpaired Welch's  $t$ -test:  $t_{11.761} = -0.49087$ ,  $p = 0.6325$ ) was also similar.
- (J)** Demand elasticity  $\alpha$  (unpaired Welch's  $t$ -test:  $t_{7.9396} = 0.64455$ ,  $p = 0.5374$ ) was also similar.

Bar graphs and line graphs represent mean  $\pm$  sem.



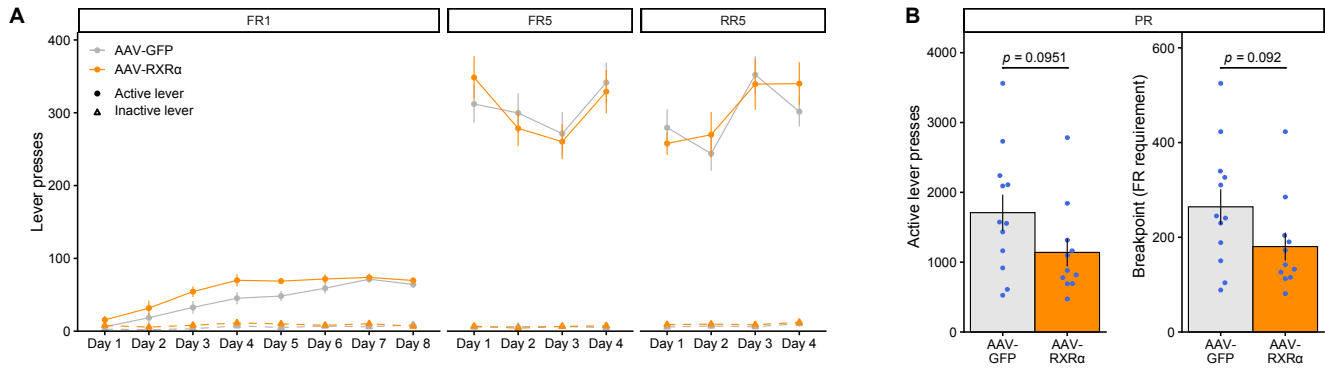

**Figure S8. Lever pressing behavior during saccharine water operant responding.** (related to Figure 8)

- (A)** Lever pressing behavior during FR1 acquisition and stable responding under FR5 and RR5 schedules (full statistics in Supplemental Table S6)
- (B)** Motivation-related parameters under PR schedule. RXR $\alpha$  overexpression resulted in trending decreases in total number of active lever presses (left, unpaired Welch's  $t$ -test:  $t_{20.187} = 1.7512$ ,  $p = 0.0951$ ) and in breakpoint measured as the last FR requirement reached and failed (right, unpaired Welch's  $t$ -test:  $t_{20.353} = 1.7682$ ,  $p = 0.09202$ ), both averaged across 3 consecutive testing days.

Bar graphs and line graphs represent mean  $\pm$  sem.

| Gene                 | Forward (5' to 3')     | Reverse (5' to 3')       |
|----------------------|------------------------|--------------------------|
| <i>Arc</i>           | GGAGGGAGGTCTTCTACCGT   | CTACAGAGACAGTGTGGCGG     |
| <i>Drd1a</i>         | TTCTTCCTGGTATGGCTTGG   | GCTTAGCCCTCACGTTCTTG     |
| <i>Drd2</i>          | TATGCCCTGGGTCGTCTATC   | AGGACAGGACCCAGACAATG     |
| <i>cFos</i>          | TACTACCATTCCCCAGCCGA   | GCTGTCACCGTGGGGATAAA     |
| <i>FosB</i>          | GTGAGAGATTTGCCAGGGTC   | AGAGAGAAGCCGTCAGGTTG     |
| $\Delta$ <i>FosB</i> | AGGCAGAGCTGGAGTCGGAGAT | GCCGAGGACTTGAACCTTCACTCG |
| <i>Gria1</i>         | CTGTGAATCAGAACGCCTCA   | TCACTTGTCTCCACTGCTG      |
| <i>Grin1</i>         | ACTCCCAACGACCACTTCAC   | GTAGACGCGCATCATCTCAA     |
| <i>Homer1a</i>       | CTGACCAGTACCCCTTCACAG  | TGTGTCACATCGGGTGTCTC     |
| <i>Npas4</i>         | TATGGACTGCTACACCCCGA   | GGCTTGAAGTCTCACCACCA     |
| <i>Nr4a1</i>         | AAAGTTGGGGGAGTGTGCTA   | TGAGCTTGAATACAGGGCATCT   |
| <i>Ppia</i>          | CAAATGCTGGACCAAACAAACG | GTTTCATGCCTTCTTTACCTTCCC |
| <i>Rpl38</i>         | AGGATGCCAAGTCTGTCAAGA  | TCCTTGTCTGTGATAACCAGGG   |
| <i>Rxra-1</i>        | CTGCCCATCCCTCAGGAAAT   | TTGCAGCCCTCACAACTGTAT    |
| <i>Rxra-2</i>        | TGCAAGGGCTTCTTCAAGAG   | TGGTGGACTCCACCTCGTTC     |
| <i>Tbp</i>           | CCCCACAACCTTTCCATTCT   | GCAGGAGTGATAGGGGTCAT     |
| <i>Zif268</i>        | CTGACCAACGAGAAGCCCAA   | TCCCAAGTAGGTCACGGTCT     |

**Table S4. List of RT-qPCR primers.** (related to Figures 2, S2 and S3)

| Target   | Company                     | Reference | Species           | Dilution   | RRID       |
|----------|-----------------------------|-----------|-------------------|------------|------------|
| ARC      | Santa Cruz                  | sc-17839  | Mouse monoclonal  | 2 µg/ml    | AB_626696  |
| pCREB    | Cell Signaling Technologies | 9198S     | Rabbit monoclonal | 1:1000     | AB_2561044 |
| pERK     | Cell Signaling Technologies | 4370S     | Rabbit monoclonal | 1:1000     | AB_2315112 |
| GluN2B   | EMD Millipore               | 06-600    | Rabbit polyclonal | 1 µg/ml    | AB_310193  |
| PSD95    | Abcam                       | ab18258   | Rabbit polyclonal | 1 µg/ml    | AB_444362  |
| p65/RELA | Invitrogen                  | 436700    | Mouse monoclonal  | 0.5 µg/ml  | AB_2532217 |
| TBP      | Abcam                       | ab63766   | Rabbit polyclonal | 1 µg/ml    | AB_1281140 |
| RXRa     | Abcam                       | ab125001  | Rabbit monoclonal | 0.12 µg/ml | AB_1097563 |
| Actin    | MP Biomedicals              | 691002    | Mouse monoclonal  | 1:50000    | AB_2335304 |

**Table S5. List of antibodies and usage details.** (related to Figures 2, S2 and S3)
